# Supplementary material for: Current real-life use of vasopressors and inotropes in cardiogenic shock - adrenaline use is associated with excess organ injury and mortality
Source: Springer Nature journal article supplement (doi:10.1186/s13054-016-1387-1), 2016-07-01
Supplement: MOESM1 [file 10333170]

**Table S1.** Comparison of patient characteristics between survivors and non-survivors at 90 days.

|                             | <b>All<br/>n=216</b> | <b>Alive at 90 days<br/>n=127</b> | <b>Dead at 90 days<br/>n=89</b> | <b>p</b>     |
|-----------------------------|----------------------|-----------------------------------|---------------------------------|--------------|
| Age (mean; SD)              | 66.6 (11.8)          | 64.3 (12.2)                       | 70.0 (10.5)                     | <0.001       |
| Women (%)                   | 26%                  | 22%                               | 33%                             | 0.08         |
| <b>Medical history (%)</b>  |                      |                                   |                                 |              |
| Coronary artery disease     | 35%                  | 24%                               | 51%                             | <0.001       |
| Previous MI                 | 25%                  | 16%                               | 38%                             | <0.001       |
| Previous PCI                | 15%                  | 12%                               | 19 %                            | 0.14         |
| Previous CABG               | 7%                   | 2%                                | 16%                             | <0.001       |
| Heart failure               | 17%                  | 13%                               | 21%                             | 0.12         |
| Hypertension                | 60%                  | 55%                               | 67%                             | 0.07         |
| Diabetes                    | 28%                  | 22%                               | 36%                             | 0.03         |
| <b>Renal insufficiency</b>  | <b>12%</b>           | <b>19%</b>                        | <b>6%</b>                       | <b>0.004</b> |
| Atrial fibrillation/flutter | 15%                  | 14%                               | 16%                             | 0.8          |
|                             |                      |                                   |                                 |              |

|                                |         |         |         |        |
|--------------------------------|---------|---------|---------|--------|
| <b>Clinical presentation</b>   |         |         |         |        |
| ACS etiology                   | 81%     | 77%     | 85%     | 0.1    |
| Blood pressure (mmHg)          |         |         |         |        |
| Systolic                       | 78 (14) | 80 (14) | 74 (12) | 0.001  |
| Diastolic                      | 47 (10) | 48 (9)  | 45 (11) | 0.04   |
| Mean arterial pressure         | 57 (11) | 58 (10) | 55 (11) | 0.02   |
| Heart rate (beats/min)         | 90 (28) | 90 (26) | 91 (31) | 0.7    |
| Sinus rhythm                   | 77%     | 84%     | 67%     | 0.004  |
| <b>Clinical findings</b>       |         |         |         |        |
| Cold periphery                 | 95%     | 93%     | 98%     | 0.1    |
| Confusion                      | 68%     | 58%     | 83%     | <0.001 |
| Oliguria                       | 57%     | 44%     | 75%     | <0.001 |
| Lactate >2 mmol/l              | 72%     | 58%     | 92%     | <0.001 |
| Resuscitation before enrolment | 28%     | 23%     | 35%     | 0.05   |
|                                |         |         |         |        |
| LVEF [% , mean(SD)]            | 33 (14) | 37 (15) | 28 (12) | <0.001 |

|                                   |                 |                 |                   |        |
|-----------------------------------|-----------------|-----------------|-------------------|--------|
|                                   |                 |                 |                   |        |
| <b>Biochemistry</b>               |                 |                 |                   |        |
| Hemoglobin (g/l)                  | 128 (22)        | 131 (21)        | 125 (23)          | 0.05   |
| Creatinine (umol/l)               | 105 (80-139)    | 96 (73-127)     | 123 (91-174)      | <0.001 |
| eGFR (ml/min/1.73m <sup>2</sup> ) | 60 (41-85)      | 67 (49-93)      | 45 (30-67)        | <0.001 |
| <60 ml/min/1.73m <sup>2</sup>     | 50%             | 38%             | 66%               | <0.001 |
| Lactate (mmol/l)                  | 2.9 (1.7-5.8)   | 2.2 (1.4-3.8)   | 5.0 (2.8-8.3)     | <0.001 |
| hsTnT (ng/l)                      | 2190 (393-5419) | 1390 (208-4191) | 2862 (1050-8346)  | 0.009  |
| NT-proBNP                         | 2710 (599-9583) | 2026 (469-7066) | 5174 (1186-16549) | 0.002  |

Results shown as % for categorical and mean (SD) or median (IQR) for continuous variables.

MI = myocardial infarction, PCI = percutaneous coronary intervention, CABG = coronary artery bypass graft surgery, LVEF = left ventricular ejection fraction, eGFR = estimated glomerular filtration rate (calculated using CKD-EPI equation), hsTnT = high sensitivity troponin T, NT-proBNP = N-terminal pro-B-type natriuretic peptide
