# Supplementary material for: Current real-life use of vasopressors and inotropes in cardiogenic shock - adrenaline use is associated with excess organ injury and mortality
Source: Springer Nature journal article supplement (doi:10.1186/s13054-016-1387-1), 2016-07-01
Supplement: MOESM2 [file 10333170]

**Table S2.** Comparison between adrenaline-treated patients and those treated with other vasopressors in relation to initial signs and markers of hemodynamic stress, as well as use of invasive ventilatory support, and mechanical support.

|                                                     | <b>Adrenaline<br/>(n=46)</b> | <b>Other vasopressor<br/>(n=137)</b> | <b>p</b> |
|-----------------------------------------------------|------------------------------|--------------------------------------|----------|
| ACS etiology                                        | 87%                          | 81%                                  | 0.4      |
| STEMI (% of ACS)                                    | 78%                          | 85%                                  | 0.3      |
| NSTEMI (% of ACS)                                   | 23%                          | 13%                                  | 0.2      |
| PCI (% of ACS)                                      | 80%                          | 87%                                  | 0.3      |
| Resuscitation prior to enrolment                    | 39%                          | 27%                                  | 0.1      |
| Clinical signs of hypoperfusion                     |                              |                                      |          |
| Cold periphery                                      | 98%                          | 93%                                  | 0.3      |
| Confusion                                           | 96%                          | 61%                                  | <0.001   |
| Oliguria                                            | 82%                          | 51%                                  | <0.001   |
| Lactate > 2 mmol/l                                  | 93%                          | 65%                                  | <0.001   |
| Blood pressure (mmHg; mean (SD))                    |                              |                                      |          |
| systolic                                            | 77 (15)                      | 78 (14)                              | 0.9      |
| diastolic                                           | 44 (13)                      | 47 (10)                              | 0.1      |
| mean arterial pressure                              | 55 (12)                      | 57 (10)                              | 0.4      |
| Heart rate (bpm; mean (SD))                         | 96 (29)                      | 88 (27)                              | 0.1      |
| Sinus rhythm                                        | 72%                          | 80%                                  | 0.2      |
| LVEF (%)                                            | 31%                          | 33%                                  | 0.5      |
| Cardiac index (l/min/m <sup>2</sup> ; median (IQR)) | 2.1 (1.8-2.8)                | 2.0 (1.6-2.9)                        | 0.5      |
| Lactate (mmol/l; median (IQR))                      |                              |                                      |          |
| at inclusion                                        | 5.6 (3.2-8.6)                | 2.6 (1.5-4.9)                        | <0.001   |
| at 24 hours                                         | 2.6 (1.6-6.7)                | 1.3 (1.0-1.8)                        | <0.001   |
| <b>Mechanical support</b>                           |                              |                                      |          |
| Invasive ventilatory support                        | 89%                          | 60%                                  | <0.001   |
| Intra-aortic balloon pump                           | 74%                          | 56%                                  | 0.03     |
| LVAD or ECMO                                        | 15%                          | 2%                                   | <0.001   |

SD = standard deviation, LVEF = left ventricular ejection fraction, IQR = interquartile range, ACS = acute coronary syndrome, PCI = percutaneous coronary intervention, LVAD = left ventricular assist device, ECMO = extracorporeal membrane oxygenation
