# Supplementary material for: Current real-life use of vasopressors and inotropes in cardiogenic shock - adrenaline use is associated with excess organ injury and mortality
Source: Springer Nature journal article supplement (doi:10.1186/s13054-016-1387-1), 2016-07-01
Supplement: MOESM4 [file 10333170]

**Table S2.** Baseline characteristics used in propensity score matching in relation to 90-day mortality in patients treated with vasopressors and the balance achieved between the propensity score-matched groups.

|                                  | Vasopressor-treated patients |                           |        | Propensity score matched cohorts |                               |                               |                     |                       |                           |
|----------------------------------|------------------------------|---------------------------|--------|----------------------------------|-------------------------------|-------------------------------|---------------------|-----------------------|---------------------------|
|                                  | Imputed cohorts pooled       |                           |        | Imputed cohort 1<br>(n 40:40)    | Imputed cohort 2<br>(n 39:39) | Imputed cohort 3<br>(n 41:41) | Pooled<br>(n=40:40) |                       |                           |
|                                  | Alive at 90 days<br>(n=101)  | Dead at 90 days<br>(n=82) | p      | SMD<br>(avg  SMD  0.037)         | SMD<br>(avg  SMD  0.053)      | SMD<br>(avg  SMD  0.039)      | Adrenaline          | Other<br>vasopressors | SMD <br>(avg  SMD  0.033) |
| Age (years)                      | 64.1                         | 70.4                      | <0.001 | -0.008                           | 0.099                         | 0.027                         | 68.3                | 67.9                  | 0.044                     |
| Women (%)                        | 21%                          | 33%                       | 0.06   | 0                                | 0                             | 0                             | 73%                 | 73%                   | 0                         |
| Previous MI                      | 15%                          | 39%                       | <0.001 | 0.054                            | 0                             | 0                             | 28%                 | 27%                   | 0.018                     |
| Previous CABG                    | 1%                           | 15%                       | <0.001 | 0                                | -0.090                        | 0.086                         | 9%                  | 9%                    | 0.059                     |
| History of hypertension          | 53%                          | 68%                       | 0.04   | 0.105                            | 0.054                         | 0.103                         | 70%                 | 65%                   | 0.088                     |
| History of renal insufficiency   | 7%                           | 20%                       | 0.01   | 0                                | 0.128                         | 0                             | 18%                 | 20%                   | 0.043                     |
| ACS etiology                     | 78%                          | 88%                       | 0.09   | 0                                | 0                             | 0.072                         | 87%                 | 86%                   | 0.024                     |
| Resuscitation prior to enrolment | 24%                          | 38%                       | 0.04   | 0                                | 0                             | 0.049                         | 37%                 | 36%                   | 0.016                     |
| Systolic BP (mmHg)               | 80                           | 74                        | 0.005  | 0.023                            | 0.114                         | -0.012                        | 77.7                | 77.1                  | 0.050                     |
| Sinus rhythm                     | 86%                          | 68%                       | 0.004  | -0.055                           | -0.056                        | 0.107                         | 72%                 | 75%                   | 0.073                     |
| Confusion                        | 59%                          | 83%                       | <0.001 | 0.121                            | 0                             | 0                             | 95%                 | 94%                   | 0.040                     |
| LVEF [%]                         | 35                           | 29                        | 0.001  | -0.053                           | 0.112                         | -0.042                        | 32                  | 32                    | 0.069                     |
| Creatinine (µmol/l)              | 108                          | 156                       | <0.001 | -0.004                           | -0.049                        | -0.029                        | 144                 | 147                   | 0.027                     |
| Lactate (mmol/l)                 | 3.1                          | 6.4                       | <0.001 | -0.125                           | -0.062                        | 0.018                         | 5.4                 | 5.7                   | 0.068                     |
| Propensity score                 | -                            | -                         | -      | 0.008                            | 0.027                         | 0.039                         | 0.363               | 0.359                 | 0.024                     |

Results shown as % for categorical and means for continuous variables. Balance between the matched groups was assessed with standardized mean difference (SMD) of covariates and propensity score, and by the average of the absolute SMDs (avg |SMD|) of covariates.

MI = myocardial infarction, PCI = percutaneous coronary intervention, CABG = coronary artery bypass graft surgery, LVEF = left ventricular ejection fraction
