# Supplementary material for: Current real-life use of vasopressors and inotropes in cardiogenic shock - adrenaline use is associated with excess organ injury and mortality
Source: Springer Nature journal article supplement (doi:10.1186/s13054-016-1387-1), 2016-07-01
Supplement: MOESM6 [file 10333170]

**Table S4.** Maximum infusion rates of vasoactive medications in patients treated with and without adrenaline.

|               | <b>Maximum infusion rate (ug/kg/min; median (IQR))</b> |                                     | <b>p</b> |
|---------------|--------------------------------------------------------|-------------------------------------|----------|
|               | Patients treated with adrenaline                       | Patients treated without adrenaline |          |
| Noradrenaline | 0.50 (0.34-1.06)                                       | 0.24 (0.13-0.43)                    | <0.001   |
| Dopamine      | 8.3 (5.0-11.3)                                         | 5.0 (3.1-10.8)                      | 0.3      |
| Dobutamine    | 11.4 (6.7-24.4)                                        | 8.1 (6.0-14.1)                      | 0.05     |
| Levosimendan  | 0.13 (0.10-0.44)                                       | 0.14 (0.10-0.21)                    | 0.5      |

IQR = interquartile range
