# Supplementary material for: Current real-life use of vasopressors and inotropes in cardiogenic shock - adrenaline use is associated with excess organ injury and mortality
Source: Springer Nature journal article supplement (doi:10.1186/s13054-016-1387-1), 2016-07-01
Supplement: MOESM7 [file 10333170]

**Figure S2.** Hemodynamics and biomarkers in patients receiving either combination of noradrenaline-dobutamine (dark grey; N + D) or noradrenaline-levosimendan (light grey; N + L).

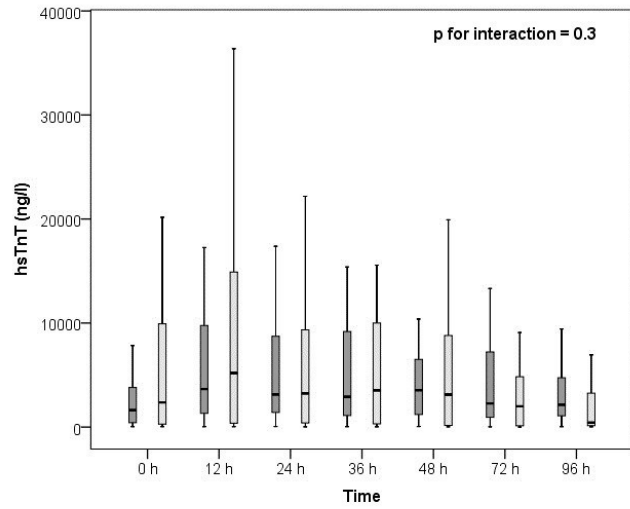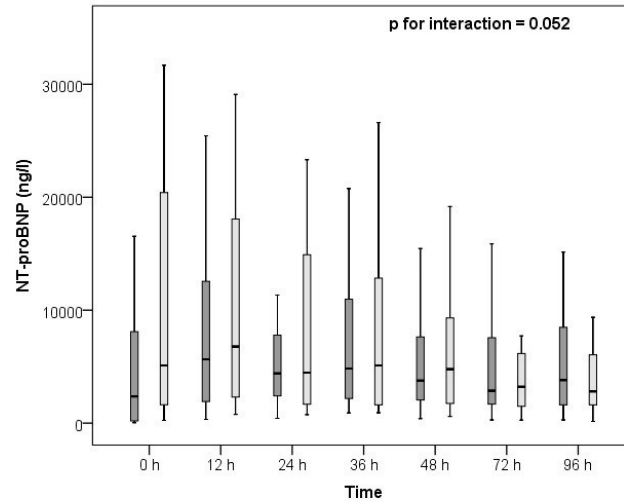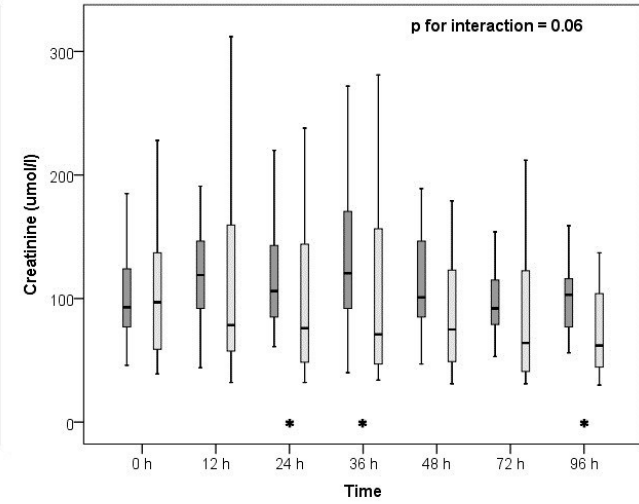

N

|     |    |    |    |    |    |    |    |
|-----|----|----|----|----|----|----|----|
| N+D | 38 | 35 | 33 | 32 | 31 | 30 | 26 |
| N+L | 28 | 28 | 27 | 28 | 26 | 19 | 15 |

N

|     |    |    |    |    |    |    |    |
|-----|----|----|----|----|----|----|----|
| N+D | 38 | 35 | 33 | 32 | 31 | 30 | 26 |
| N+L | 28 | 28 | 27 | 28 | 26 | 19 | 15 |

N

|     |    |    |    |    |    |    |    |
|-----|----|----|----|----|----|----|----|
| N+D | 38 | 35 | 33 | 32 | 31 | 30 | 26 |
| N+L | 28 | 28 | 27 | 28 | 26 | 19 | 15 |

■ N + D  
□ N + L

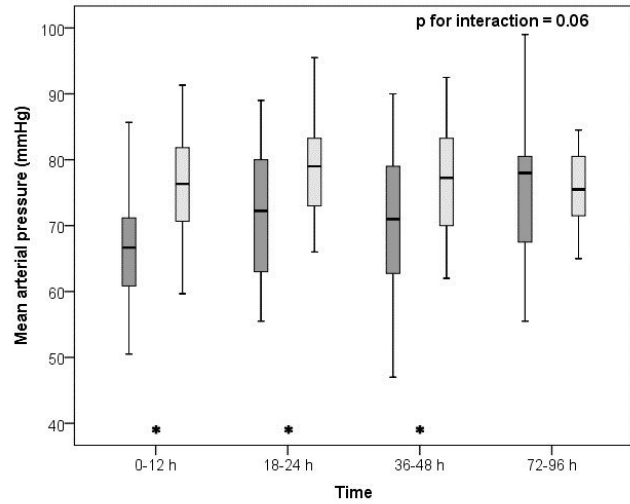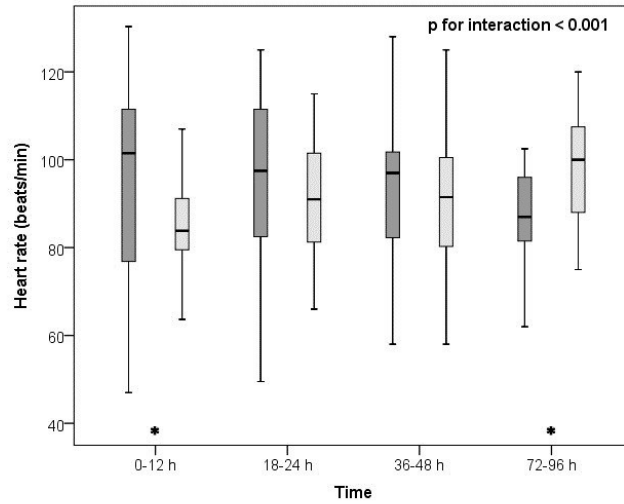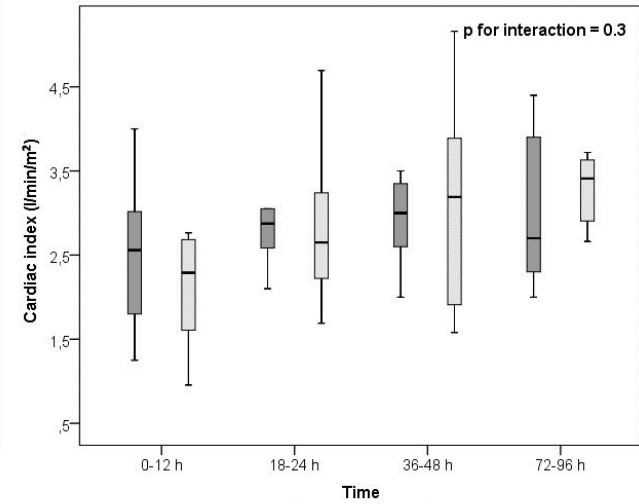

N

|     |    |    |    |    |
|-----|----|----|----|----|
| N+D | 40 | 38 | 35 | 33 |
| N+L | 28 | 27 | 28 | 20 |

N

|     |    |    |    |    |
|-----|----|----|----|----|
| N+D | 40 | 38 | 35 | 33 |
| N+L | 28 | 28 | 28 | 21 |

N

|     |    |    |    |    |
|-----|----|----|----|----|
| N+D | 16 | 14 | 13 | 14 |
| N+L | 10 | 12 | 13 | 7  |

Figures represent box plots (central line = median, box = interquartile range, whiskers = minimum and maximum with outliers excluded) of separate measurements in each time point in the upper row (biomarkers) and the mean values of time intervals in the lower row (hemodynamics). Patients receiving both dobutamine and levosimendan, or adrenaline were excluded.

hsTnT = high sensitivity troponin T, NT-proBNP = N-terminal pro-B-type natriuretic peptide

\* =  $p < 0.05$  for pairwise comparison between the groups

P for interaction = P value for time-by-group interaction
